# Supplementary material
Source: PubMed Central journal article supplement (PMC5118678)
Supplement: jcav07p2132s1.pdf [file jcav07p2132s1.pdf]

1 **Supplementary Figures and Legends**

2

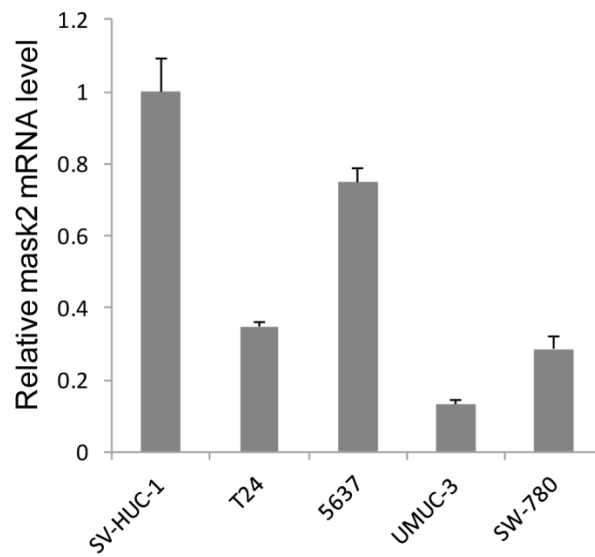

3

4 **Figure S1. Mask2 expression level in different bladder cancer cells.**

5 qPCR to check Mask2 expression level in different bladder cancer cells (SV-HUC-1 is normal  
6 urothelial cell, T24, 5637, UMUC-3 and SW-780 are different bladder cancer cells).

7

8
